# Supplementary material
Source: PubMed Central journal article supplement (PMC3255779)
Supplement: supp_32.2.541_MCB-MCB06032-11-s01.pdf [file supp_32.2.541_MCB-MCB06032-11-s01.pdf]

Supplemental Figure 1. Peptides detected by MS for Sum1-3Flag purified under different conditions.

0 Hours

1 MSENTTAPSD NITNEQRLPS GPKDDVDTLA LTSAQNQANS LRKLDTDANA KALPSITDIP VSDSDIKRQ  
 71 VGSGFGSNPL HIKDSEAFPH SSIEALKEGM DKVTKQCNDL KTALLSKDTS LTDSVQDLFN SLKVLSHNQS  
 131 VLENKLDDVM KNQVNTDILV NNLNERLNKL STMLQNTSKV NHSNLLIENS SNNTSSQHNT SSSRRGPRP  
 201 RKDASTSTMN KLVSNAASVN LKSASNQAG FSPVNITLPT AVVQTSKSKR YFVEPSTKQE SLLLSAPSSS  
 271 RDDADMSLTS VPQRTNNENG KERPSTANSS SITPTPVTPN NLIQIKRKRKRG RPPKRTVET MISNSTDTID  
 341 KSDASNRIKN EIPINSLPSS SKFHQIPSSP SNPVSQPAPV RTSRSATQEI DIKSLELASL ISTNGDPNAE  
 411 DSNTTDTVHN NVEGKVNVEE NKTEKEKIIT IKSSSENSGN NTTNNNNTDN VIKFSANSDI NSDIRRLMVN  
 481 DQFSLSYDAS GNITVKLPPV SSPAAATAAA AAAVTSEMNR QORELDKRRD SREKMLVNMK YNDRDKAKSF  
 551 MESNKLLKA MKEEERRKRM TSIIHDNHLN LNLNEISTR KIKSAEKPTT KGSSMSPKPR SASISGISDH  
 621 QOEGYQPLEQ EKLVDIDNEG SNANSDSLKM GLTISAADTV HKVGIQSMNLN SGEEAITKEN AEYERKTPGD  
 691 EETTTTFVPLE NSQPSDTIRK RTAGDDGALD QTENTSISP KRRTEDHTKG EEDEGERGVG NSGTLATVEN  
 761 VSGDISADLS KGTSSIHNDT ESANDSSNGN GNLGLGTESR NTLLTATPIE LICREGFFYR RDIPDVPITT  
 831 GAYLEFKFKA KEEELINSSI NEEDYAASK HEKMAHFFK PDIQEETELA FEILSKTTLT EKYVNSLEYF  
 901 LMEFRWENKL VGLGLKLRES KRTWQRRKAL FALFEFWRDQ SRDKRRFHNY TILHAVKEME NYRIFINRSV  
 971 SWFYNHITLL KMILYDLCDN VTTQWREWMF PHNETLPALG QDGINEDNLN ETIDNMLIFD FLDDGSENNO  
 1041 VKYSRIIPP IR\*DYKDHDGD YKDHDIDYKD DDDK

8 Hours – PP1

1 MSENTTAPSD NITNEQRLPS GPKDDVDTLA LTSAQNQANS LRKLDTDANA KALPSITDIP VSDSDIKRQ  
 71 VGSGFGSNPL HIKDSEAFPH SSIEALKEGM DKVTKQCNDL KTALLSKDTS LTDSVQDLFN SLKVLSHNQS  
 131 VLENKLDDVM KNQVNTDILV NNLNERLNKL STMLQNTSKV NHSNLLIENS SNNTSSQHNT SSSRRGPRP  
 201 RKDASTSTMN KLVSNAASVN LKSASNQAG FSPVNITLPT AVVQTSKSKR YFVEPSTKQE SLLLSAPSSS  
 271 RDDADMSLTS VPQRTNNENG KERPSTANSS SITPTPVTPN NLIQIKRKRKRG RPPKRTVET MISNSTDTID  
 341 KSDASNRIKN EIPINSLPSS SKFHQIPSSP SNPVSQPAPV RTSRSATQEI DIKSLELASL ISTNGDPNAE  
 411 DSNTTDTVHN NVEGKVNVEE NKTEKEKIIT IKSSSENSGN NTTNNNNTDN VIKFSANSDI NSDIRRLMVN  
 481 DQFSLSYDAS GNITVKLPPV SSPAAATAAA AAAVTSEMNR QORELDKRRD SREKMLVNMK YNDRDKAKSF  
 551 MESNKLLKA MKEEERRKRM TSIIHDNHLN LNLNEISTR KIKSAEKPTT KGSSMSPKPR SASISGISDH  
 621 QOEGYQPLEQ EKLVDIDNEG SNANSDSLKM GLTISAADTV HKVGIQSMNLN SGEEAITKEN AEYERKTPGD  
 691 EETTTTFVPLE NSQPSDTIRK RTAGDDGALD QTENTSISP KRRTEDHTKG EEDEGERGVG NSGTLATVEN  
 761 VSGDISADLS KGTSSIHNDT ESANDSSNGN GNLGLGTESR NTLLTATPIE LICREGFFYR RDIPDVPITT  
 831 GAYLEFKFKA KEEELINSSI NEEDYAASK HEKMAHFFK PDIQEETELA FEILSKTTLT EKYVNSLEYF  
 901 LMEFRWENKL VGLGLKLRES KRTWQRRKAL FALFEFWRDQ SRDKRRFHNY TILHAVKEME NYRIFINRSV  
 971 SWFYNHITLL KMILYDLCDN VTTQWREWMF PHNETLPALG QDGINEDNLN ETIDNMLIFD FLDDGSENNO  
 1041 VKYSRIIPP IR\*DYKDHDGD YKDHDIDYKD DDDK

8 Hours + PP1

1 MSENTTAPSD NITNEQRLPS GPKDDVDTLA LTSAQNQANS LRKLDTDANA KALPSITDIP VSDSDIKRQ  
 71 VGSGFGSNPL HIKDSEAFPH SSIEALKEGM DKVTKQCNDL KTALLSKDTS LTDSVQDLFN SLKVLSHNQS  
 131 VLENKLDDVM KNQVNTDILV NNLNERLNKL STMLQNTSKV NHSNLLIENS SNNTSSQHNT SSSRRGPRP  
 201 RKDASTSTMN KLVSNAASVN LKSASNQAG FSPVNITLPT AVVQTSKSKR YFVEPSTKQE SLLLSAPSSS  
 271 RDDADMSLTS VPQRTNNENG KERPSTANSS SITPTPVTPN NLIQIKRKRKRG RPPKRTVET MISNSTDTID  
 341 KSDASNRIKN EIPINSLPSS SKFHQIPSSP SNPVSQPAPV RTSRSATQEI DIKSLELASL ISTNGDPNAE  
 411 DSNTTDTVHN NVEGKVNVEE NKTEKEKIIT IKSSSENSGN NTTNNNNTDN VIKFSANSDI NSDIRRLMVN  
 481 DQFSLSYDAS GNITVKLPPV SSPAAATAAA AAAVTSEMNR QORELDKRRD SREKMLVNMK YNDRDKAKSF  
 551 MESNKLLKA MKEEERRKRM TSIIHDNHLN LNLNEISTR KIKSAEKPTT KGSSMSPKPR SASISGISDH  
 621 QOEGYQPLEQ EKLVDIDNEG SNANSDSLKM GLTISAADTV HKVGIQSMNLN SGEEAITKEN AEYERKTPGD  
 691 EETTTTFVPLE NSQPSDTIRK RTAGDDGALD QTENTSISP KRRTEDHTKG EEDEGERGVG NSGTLATVEN  
 761 VSGDISADLS KGTSSIHNDT ESANDSSNGN GNLGLGTESR NTLLTATPIE LICREGFFYR RDIPDVPITT  
 831 GAYLEFKFKA KEEELINSSI NEEDYAASK HEKMAHFFK PDIQEETELA FEILSKTTLT EKYVNSLEYF  
 901 LMEFRWENKL VGLGLKLRES KRTWQRRKAL FALFEFWRDQ SRDKRRFHNY TILHAVKEME NYRIFINRSV  
 971 SWFYNHITLL KMILYDLCDN VTTQWREWMF PHNETLPALG QDGINEDNLN ETIDNMLIFD FLDDGSENNO  
 1041 VKYSRIIPP IR\*DYKDHDGD YKDHDIDYKD DDDK

-red letters indicate peptides detected by mass spectrometry

-asterisks indicate the end of the protein and the beginning of the FLAG tag

-underlines indicate potential Cdc7 phosphorylation sites

**Supplemental Table 1. Peptides identified by mass spectrometry from Sum1 purified from vegetative cells (T=0), 8 hours after transfer to Spo medium (T= 8) or 8 hours after transfer to Spo medium + 15 ml PP1 (T=8 PP1). G = peptides generated by GluC digestion. T = peptides generated by trypsin digestion.**

| POSITION | SEQUENCE                                   | t=8 G                  | t=8 T                                              | t=8 PP1 G | t=8 PP1 T                                         | t=0 G                  | t=0 T                                                                                                                               |
|----------|--------------------------------------------|------------------------|----------------------------------------------------|-----------|---------------------------------------------------|------------------------|-------------------------------------------------------------------------------------------------------------------------------------|
| 4-15     | <a href="#">NTTAPSDNITNE</a>               |                        |                                                    |           |                                                   |                        |                                                                                                                                     |
|          | E.N~TTAPSDNITNE.Q                          | <a href="#">3718.2</a> |                                                    |           |                                                   | <a href="#">3357.2</a> |                                                                                                                                     |
| 18-42    | <a href="#">LPSGPKDDVDTLAL TSAQNQANSLR</a> |                        |                                                    |           |                                                   |                        |                                                                                                                                     |
|          | R.LPSGPKDDVDTLAL TSAQ~NQANSLR.K            |                        |                                                    |           | <a href="#">11777.3</a>                           |                        | <a href="#">11828.3</a>                                                                                                             |
|          | R.LPSGPKDDVDTLAL TSAQNQ~ANSLR.K            |                        | <a href="#">15449.3</a><br><a href="#">13920.3</a> |           | <a href="#">9303.3</a><br><a href="#">10114.3</a> |                        | <a href="#">11872.3</a><br><a href="#">13571.3</a><br><a href="#">12442.3</a><br><a href="#">12198.3</a><br><a href="#">12895.3</a> |
|          | R.LPS#GPKDDVDTLAL TSAQNQAN~SLR.K           |                        | <a href="#">15230.3</a><br><a href="#">15289.3</a> |           |                                                   |                        |                                                                                                                                     |
|          | R.LPS#GPKDDVDTLAL TSAQNQANSLR.K            |                        |                                                    |           |                                                   |                        | <a href="#">14653.3</a>                                                                                                             |
|          | R.LPSGPKDDVDTLAL TSAQNQAN~SLR.K            |                        | <a href="#">14528.3</a>                            |           |                                                   |                        |                                                                                                                                     |
|          | R.LPSGPKDDVDTLAL TSAQNQANSLR.K             |                        |                                                    |           |                                                   |                        | <a href="#">13293.4</a>                                                                                                             |
| 24-42    | <a href="#">DDVDTLAL TSAQNQANSLR</a>       |                        |                                                    |           |                                                   |                        |                                                                                                                                     |
|          | K.DDVDTLAL TSAQNQAN~SLR.K                  |                        | <a href="#">15543.2</a><br><a href="#">13162.2</a> |           | <a href="#">8906.2</a><br><a href="#">10858.2</a> |                        |                                                                                                                                     |

|         |                                              |                |                                  |  |                                                    |                |                                  |
|---------|----------------------------------------------|----------------|----------------------------------|--|----------------------------------------------------|----------------|----------------------------------|
|         | K.DDVDTLALTAQ~QANSLR.K                       |                | <u>15859.2</u><br><u>15172.3</u> |  | <u>11083.2</u><br><u>11070.3</u><br><u>11105.2</u> |                | <u>13930.2</u><br><u>13328.3</u> |
|         | K.DDVDTLALTAQ~QANSLR.K                       |                |                                  |  |                                                    |                | <u>11318.2</u>                   |
|         | K.DDVDTLALTAQ~QANSLR.K                       |                |                                  |  | <u>8951.2</u>                                      |                |                                  |
| 43-51   | <u>KLDTDANAK</u>                             |                |                                  |  |                                                    |                |                                  |
|         | R.KLDTDANAK.A                                |                |                                  |  | <u>325.2</u>                                       |                |                                  |
| 48-86   | <u>ANAKALPSITDIPVSDSDIKRQVGSFGSNPLHIKDSE</u> |                |                                  |  |                                                    |                |                                  |
|         | D.ANAKALPSITDIPVSDSDIKRQVGSFGSNPLHIKDSE.A    | <u>17805.5</u> |                                  |  |                                                    |                |                                  |
| 52-69   | <u>ALPSITDIPVSDSDIKR</u>                     |                |                                  |  |                                                    |                |                                  |
|         | K.ALPSITDIPVSDSDIKR.Q                        |                | <u>15340.2</u><br><u>15565.2</u> |  | <u>10717.2</u>                                     |                | <u>13409.2</u><br><u>13657.2</u> |
|         | K.ALPSITDIPVSDSDIKR.Q                        |                | <u>15567.2</u><br><u>15548.2</u> |  |                                                    |                |                                  |
| 70-83   | <u>QVGSFGSNPLHIK</u>                         |                |                                  |  |                                                    |                |                                  |
|         | R.QVGSFGSNPLHIK.D                            |                | <u>11586.2</u><br><u>11549.3</u> |  |                                                    |                | <u>10046.3</u>                   |
| 110-127 | <u>LKTALLSKDTSLTDSVQD</u>                    |                |                                  |  |                                                    |                |                                  |
|         | D.LKTALLSKDTSLTDSVQD.L                       | <u>11652.2</u> |                                  |  |                                                    | <u>10861.2</u> |                                  |
| 118-133 | <u>DTSLTDSVQDLFNSLK</u>                      |                |                                  |  |                                                    |                |                                  |

|         |                                     |                                  |                                                    |                |                                |                                                    |
|---------|-------------------------------------|----------------------------------|----------------------------------------------------|----------------|--------------------------------|----------------------------------------------------|
|         | K.DTSLTDSVQDLFN~SLK.V               |                                  | <u>22465.2</u><br><u>22454.3</u>                   |                |                                | <u>20366.2</u><br><u>20347.3</u><br><u>22198.2</u> |
|         | K.DTSLTDS#VQDLFNSLK.V               |                                  |                                                    |                |                                | <u>22004.2</u>                                     |
| 134-145 | <b><u>VLSHNQSVLENK</u></b>          |                                  |                                                    |                |                                |                                                    |
|         | K.VLSHNQSVLENK.L                    |                                  | <u>1505.2</u>                                      |                | <u>880.3</u><br><u>898.2</u>   | <u>1354.2</u><br><u>1353.3</u><br><u>1650.3</u>    |
|         | K.VLSHN~QSVLENK.L                   |                                  | <u>3492.3</u>                                      |                |                                | <u>3039.3</u><br><u>1944.3</u>                     |
| 146-166 | <b><u>LDDVMKNQVNTDILVNNLNER</u></b> |                                  |                                                    |                |                                |                                                    |
|         | K.LDDVMKN~Q~VN~TDILVNNLNER.L        |                                  |                                                    |                | <u>9548.3</u><br><u>9569.3</u> |                                                    |
| 149-165 | <b><u>VMKNQVNTDILVNNLNE</u></b>     |                                  |                                                    |                |                                |                                                    |
|         | D.VM*KNQVNTDILVNNLNE.R              | <u>14124.2</u><br><u>14117.3</u> |                                                    |                |                                | <u>12984.2</u>                                     |
|         | D.VMKNQVNTDILVNNLNE.R               | <u>15058.2</u><br><u>15087.2</u> |                                                    | <u>12077.2</u> |                                |                                                    |
| 152-166 | <b><u>NQVNTDILVNNLNER</u></b>       |                                  |                                                    |                |                                |                                                    |
|         | K.NQVNTDILVNNLN~ER.L                |                                  |                                                    |                | <u>9367.3</u>                  | <u>11861.2</u>                                     |
|         | K.NQVNTDILVNNLNER.L                 |                                  | <u>13954.2</u><br><u>13958.3</u><br><u>14151.2</u> |                | <u>9529.2</u><br><u>9533.3</u> | <u>12082.2</u><br><u>12083.3</u>                   |

|         |                                |               |                                  |               |                                |                                                    |
|---------|--------------------------------|---------------|----------------------------------|---------------|--------------------------------|----------------------------------------------------|
|         |                                |               | <u>14183.2</u>                   |               |                                | <u>12341.3</u>                                     |
|         | K.NQVN~TDILVNNLNER.L           |               | <u>14473.2</u><br><u>14490.3</u> |               |                                | <u>12731.2</u><br><u>13472.2</u><br><u>12640.3</u> |
|         | K.NQVNTDILVN~NLNER.L           |               | <u>12551.3</u>                   |               | <u>8428.2</u><br><u>8429.3</u> | <u>10816.2</u><br><u>10945.2</u>                   |
|         | K.NQVNTDILVNN~LNER.L           |               | <u>14781.2</u><br><u>14266.2</u> |               | <u>9774.2</u>                  | <u>12424.2</u><br><u>10823.3</u>                   |
|         | K.NQ~VNTDILVNNLNER.L           |               | <u>15580.2</u>                   |               |                                |                                                    |
|         | K.N~QVNTDILVNNLNER.L           |               |                                  |               |                                | <u>12723.3</u>                                     |
| 158-165 | <u>ILVNNLNE</u>                |               |                                  |               |                                |                                                    |
|         | D.ILVNNLNE.R                   | <u>9572.2</u> |                                  | <u>7090.2</u> | <u>8404.2</u>                  |                                                    |
| 166-188 | <u>RLNKLSTMLQNTSKVNHSNLLIE</u> |               |                                  |               |                                |                                                    |
|         | E.RLNKLSTM*LQNTSKVNHSNLLIE.N   |               |                                  |               | <u>10553.3</u>                 |                                                    |
| 170-179 | <u>LSTMLQNTSK</u>              |               |                                  |               |                                |                                                    |
|         | K.LSTM*LQN~TSK.V               |               | <u>1900.2</u>                    |               | <u>1071.2</u><br><u>1050.2</u> | <u>1628.2</u><br><u>1732.2</u>                     |
|         | K.LSTMLQN~TSK.V                |               |                                  |               |                                | <u>4090.2</u>                                      |
|         | K.LSTMLQNTSK.V                 |               | <u>4315.2</u>                    |               | <u>2596.2</u>                  | <u>3579.2</u>                                      |
|         | K.LSTM*LQNTSK.V                |               |                                  |               | <u>2656.2</u>                  | <u>1294.2</u>                                      |

|         |                                            |  |                                                    |                                                  |  |                                                                            |
|---------|--------------------------------------------|--|----------------------------------------------------|--------------------------------------------------|--|----------------------------------------------------------------------------|
| 180-204 | <a href="#">VNHSNLLIENSSNNTSSQHNTSSSR</a>  |  |                                                    |                                                  |  |                                                                            |
|         | K.VNHSNLLIENSSNNTSSQHN~TSSSR.R             |  | <a href="#">3098.4</a>                             |                                                  |  |                                                                            |
|         | K.VNHSNLLIENSSNN~TSSQHNTSSSR.R             |  |                                                    | <a href="#">2014.3</a>                           |  |                                                                            |
| 260-268 | <a href="#">RYFVEPSTK</a>                  |  |                                                    |                                                  |  |                                                                            |
|         | K.RYFVEPSTK.Q                              |  | <a href="#">3370.2</a><br><a href="#">3348.3</a>   | <a href="#">2046.3</a><br><a href="#">2047.2</a> |  | <a href="#">2916.2</a>                                                     |
| 261-268 | <a href="#">YFVEPSTK</a>                   |  |                                                    |                                                  |  |                                                                            |
|         | R.YFVEPSTK.Q                               |  | <a href="#">4330.2</a>                             | <a href="#">2639.2</a>                           |  | <a href="#">3744.2</a><br><a href="#">3668.2</a>                           |
| 269-294 | <a href="#">QESLLSAPSSSRDDADMSLTVPQR</a>   |  |                                                    |                                                  |  |                                                                            |
|         | K.QESLLSAPS#SSRDDADM*SLTVPQR.T             |  | <a href="#">14914.3</a>                            |                                                  |  |                                                                            |
|         | K.QESLLSAPSSS#RDDADM*SLTVPQR.T             |  | <a href="#">14757.3</a>                            |                                                  |  |                                                                            |
| 269-281 | <a href="#">QESLLSAPSSSR</a>               |  |                                                    |                                                  |  |                                                                            |
|         | K.QESLLSAPSSSR.D                           |  | <a href="#">10638.2</a><br><a href="#">10665.3</a> | <a href="#">6990.2</a><br><a href="#">7012.3</a> |  | <a href="#">9127.3</a><br><a href="#">9103.2</a><br><a href="#">9358.2</a> |
|         | K.QESLLS#APSSSR.D                          |  | <a href="#">11561.2</a>                            |                                                  |  |                                                                            |
| 271-298 | <a href="#">SLLSAPSSSRDDADMSLTVPQRTNNE</a> |  |                                                    |                                                  |  |                                                                            |
|         | E.SLLSAPSSSRDDADM*SLTVPQRTNNE.N            |  | <a href="#">15237.3</a><br><a href="#">12915.3</a> | <a href="#">9986.3</a>                           |  |                                                                            |

|         |                                    |                                                    |                        |                                                                            |                        |                         |                        |
|---------|------------------------------------|----------------------------------------------------|------------------------|----------------------------------------------------------------------------|------------------------|-------------------------|------------------------|
|         |                                    | <a href="#">15207.3</a>                            |                        |                                                                            |                        |                         |                        |
|         | E.SLLSAPSS#SS#RDDADMSLTSVPQRTNNE.N | <a href="#">18137.3</a>                            |                        |                                                                            |                        |                         |                        |
|         | E.SLLSAPSSSRDDADM*SLTSVPQRTN~NE.N  |                                                    |                        |                                                                            |                        | <a href="#">12666.3</a> |                        |
|         | E.SLLSAPSSSRDDADM*SLTSVPQRTNN~E.N  | <a href="#">13377.3</a><br><a href="#">13513.3</a> |                        |                                                                            |                        | <a href="#">12690.3</a> |                        |
|         | E.SLLS#APSSS#RDDADMSLTSVPQRTNNE.N  |                                                    |                        | <a href="#">14756.3</a>                                                    |                        |                         |                        |
|         | E.SLLSAPSSSRDDADMSLTSVPQ~RTNNE.N   |                                                    |                        | <a href="#">12689.3</a><br><a href="#">10481.3</a>                         |                        |                         |                        |
|         | E.SLLSAPSSS#RDDADM*SLTSVPQRTNNE.N  |                                                    |                        | <a href="#">11673.3</a>                                                    |                        |                         |                        |
|         | E.SLLSAPSSSRDDADMSLTSVPQRTNN~E.N   | <a href="#">15576.3</a>                            |                        |                                                                            |                        |                         |                        |
| 271-283 | <a href="#">SLLSAPSSSRDD</a>       |                                                    |                        |                                                                            |                        |                         |                        |
|         | E.SLLSAPSSSRDD.A                   |                                                    |                        | <a href="#">7684.2</a><br><a href="#">7654.2</a><br><a href="#">7698.2</a> |                        | <a href="#">9088.2</a>  |                        |
| 271-285 | <a href="#">SLLSAPSSSRDDAD</a>     |                                                    |                        |                                                                            |                        |                         |                        |
|         | E.SLLSAPSSSRDDAD.M                 |                                                    |                        | <a href="#">7914.2</a>                                                     |                        | <a href="#">9366.2</a>  |                        |
| 271-282 | <a href="#">SLLSAPSSSRD</a>        |                                                    |                        |                                                                            |                        |                         |                        |
|         | E.SLLSAPSSSRD.D                    |                                                    |                        |                                                                            |                        | <a href="#">8898.2</a>  |                        |
| 282-294 | <a href="#">DDADMSLTSVPQR</a>      |                                                    |                        |                                                                            |                        |                         |                        |
|         | R.DDADM*SLTSVPQR.T                 |                                                    | <a href="#">8550.2</a> |                                                                            | <a href="#">2811.2</a> |                         | <a href="#">3891.3</a> |





|         |                                        |  |                         |  |                         |                         |
|---------|----------------------------------------|--|-------------------------|--|-------------------------|-------------------------|
|         | K.ERPSTANSSS#IT#PTPVTNNLIQIK.R         |  |                         |  |                         | <a href="#">14558.3</a> |
|         | K.ERPSTANS#SS#ITPTPVTNNLIQIK.R         |  | <a href="#">17309.3</a> |  |                         |                         |
|         | K.ERPSTANS#SSIT#PTPVTNNLIQIK.R         |  |                         |  |                         | <a href="#">14621.3</a> |
|         | K.ERPS#TANSSSITPT#PVTNNLIQIK.R         |  |                         |  | <a href="#">11822.3</a> |                         |
|         | K.ERPSTANSSSIT#PTPVT#PNNLIQIK.R        |  |                         |  | <a href="#">10871.3</a> |                         |
|         | K.ERPS#TANSSS#ITPTPVTNNLIQIK.R         |  | <a href="#">17340.3</a> |  |                         |                         |
|         | K.ERPSTANS#SSIT#PTPVTN~NLIQIK.R        |  | <a href="#">15545.3</a> |  |                         |                         |
|         | K.ERPST#AN~SSSITPTPVTNNLIQIK.R         |  |                         |  | <a href="#">12217.3</a> |                         |
|         | K.ERPSTAN~SSSITPT#PVTNNLIQIK.R         |  |                         |  | <a href="#">11380.3</a> |                         |
| 337-351 | <b><a href="#">TVETMISNSTDTIDK</a></b> |  |                         |  |                         |                         |
|         | R.TVETM*ISN~STDTIDK.S                  |  | <a href="#">4913.2</a>  |  | <a href="#">6072.2</a>  |                         |
|         |                                        |  | <a href="#">8638.2</a>  |  | <a href="#">5709.2</a>  | <a href="#">7576.2</a>  |
|         |                                        |  | <a href="#">5154.2</a>  |  | <a href="#">3115.2</a>  | <a href="#">6566.2</a>  |
|         |                                        |  | <a href="#">9482.2</a>  |  | <a href="#">3291.2</a>  | <a href="#">4271.2</a>  |
|         |                                        |  | <a href="#">9541.2</a>  |  | <a href="#">5754.2</a>  | <a href="#">4467.2</a>  |
|         |                                        |  |                         |  | <a href="#">5682.2</a>  | <a href="#">8356.2</a>  |
|         |                                        |  |                         |  | <a href="#">3353.2</a>  |                         |
|         | R.TVETM*ISNSTDTIDK.S                   |  | <a href="#">7788.2</a>  |  |                         | <a href="#">7167.2</a>  |
|         |                                        |  | <a href="#">5351.2</a>  |  |                         | <a href="#">6818.2</a>  |
|         |                                        |  | <a href="#">8210.2</a>  |  | <a href="#">5400.2</a>  | <a href="#">7424.2</a>  |
|         |                                        |  | <a href="#">8029.2</a>  |  | <a href="#">5090.2</a>  | <a href="#">7480.2</a>  |
|         |                                        |  | <a href="#">8453.2</a>  |  | <a href="#">9007.2</a>  | <a href="#">6183.2</a>  |
|         |                                        |  | <a href="#">8332.3</a>  |  |                         | <a href="#">11597.2</a> |
|         |                                        |  | <a href="#">13202.3</a> |  |                         |                         |

|         |                                      |                                |                                 |               |                                |                                 |
|---------|--------------------------------------|--------------------------------|---------------------------------|---------------|--------------------------------|---------------------------------|
|         |                                      |                                | <u>25149.2</u>                  |               |                                |                                 |
|         |                                      |                                | <u>13241.3</u>                  |               |                                |                                 |
|         | R.TVETMISNS#TDTIDK.S                 |                                | <u>10247.2</u>                  |               | <u>6783.2</u>                  |                                 |
|         | R.TVETMISN~STDTIDK.S                 |                                | <u>9450.2</u><br><u>14362.2</u> |               | <u>9889.2</u><br><u>6259.2</u> | <u>12516.2</u><br><u>8284.2</u> |
|         | R.TVETM*ISNS#TDTIDK.S                |                                | <u>5812.2</u><br><u>5557.2</u>  |               |                                |                                 |
|         | R.TVETMISNST#DTIDK.S                 |                                | <u>10362.2</u>                  |               | <u>6840.2</u>                  |                                 |
|         | R.TVETM*IS#NSTDTIDK.S                |                                |                                 |               | <u>3712.2</u>                  |                                 |
| 337-357 | <b><u>TVETMISNSTDTIDKSDASNR</u></b>  |                                |                                 |               |                                |                                 |
|         | R.TVETMISNSTDTIDKSDASNR.I            |                                | <u>12355.2</u>                  |               | <u>8444.2</u>                  | <u>10828.2</u>                  |
|         | R.TVETM*ISNSTDTIDKSDASNR.I           |                                | <u>7649.4</u>                   |               |                                | <u>6776.2</u><br><u>6813.2</u>  |
|         | R.TVETM*ISN~STDTIDKSDASNR.I          |                                | <u>4033.3</u>                   |               |                                | <u>7547.3</u>                   |
|         | R.TVETMISN~STDTIDKSDASNR.I           |                                |                                 |               | <u>5414.3</u>                  |                                 |
| 340-361 | <b><u>TMISNSTDTIDKSDASNRIKNE</u></b> |                                |                                 |               |                                |                                 |
|         | E.TM*ISNS#TDTIDKSDASNRIKNE.I         | <u>3717.3</u>                  |                                 |               |                                |                                 |
|         | E.TM*ISNSTDTIDKSDASNRIKNE.I          | <u>3471.2</u><br><u>3542.4</u> |                                 | <u>2547.2</u> |                                | <u>3320.2</u>                   |
|         | E.TM*ISNSTDTIDKSDASN~RIKNE.I         | <u>4046.4</u>                  |                                 | <u>1825.4</u> |                                | <u>4280.4</u>                   |

|         |                              |                                |                                  |                                |                                                                      |                                                    |
|---------|------------------------------|--------------------------------|----------------------------------|--------------------------------|----------------------------------------------------------------------|----------------------------------------------------|
|         |                              | <u>3873.4</u>                  |                                  | <u>3596.4</u>                  |                                                                      |                                                    |
|         | E.TM*ISN~STDTIDKSDASNRIKNE.I | <u>7361.4</u><br><u>4646.3</u> |                                  | <u>2892.3</u>                  |                                                                      |                                                    |
|         | E.TMISNSTDTIDKSDASNRIKN~E.I  |                                |                                  |                                | <u>5599.4</u>                                                        |                                                    |
|         | E.TMISN~STDTIDKSDASNRIKNE.I  | <u>7347.3</u>                  |                                  |                                |                                                                      |                                                    |
| 340-353 | <b><u>TMISNSTDTIDKSD</u></b> |                                |                                  |                                |                                                                      |                                                    |
|         | E.TM*ISNSTDTIDKSD.A          | <u>2151.2</u><br><u>2208.2</u> |                                  | <u>1508.2</u><br><u>1528.2</u> |                                                                      | <u>2054.2</u>                                      |
|         | E.TMISNSTDTIDKSD.A           | <u>5543.2</u>                  |                                  | <u>4147.2</u>                  |                                                                      |                                                    |
| 358-372 | <b><u>IKNEIPINLLPSSK</u></b> |                                |                                  |                                |                                                                      |                                                    |
|         | R.IKNEIPINLLPSSK.F           |                                | <u>16075.3</u><br><u>15665.3</u> |                                | <u>11154.3</u><br><u>11028.3</u><br><u>10986.3</u><br><u>10929.3</u> | <u>13649.3</u>                                     |
|         | R.IKN~EIPINLLPSSK.F          |                                | <u>16381.3</u><br><u>16778.3</u> |                                | <u>11537.3</u>                                                       | <u>14442.3</u><br><u>14623.3</u><br><u>14701.3</u> |
|         | R.IKNEIPIN~SLLPSSK.F         |                                | <u>17378.3</u><br><u>14143.3</u> |                                | <u>9719.3</u><br><u>9678.3</u><br><u>12351.3</u><br><u>12225.3</u>   | <u>15237.3</u><br><u>12216.3</u><br><u>12396.3</u> |
| 360-372 | <b><u>NEIPINLLPSSK</u></b>   |                                |                                  |                                |                                                                      |                                                    |

|         |                                              |                |                                  |                |                                  |                |
|---------|----------------------------------------------|----------------|----------------------------------|----------------|----------------------------------|----------------|
|         | K.N~EIPINSLPSSK.F                            |                | <u>18837.2</u><br><u>18928.2</u> |                | <u>13399.2</u>                   | <u>16582.2</u> |
|         | K.NEIPINSLPSSK.F                             |                | <u>16957.2</u><br><u>16836.2</u> |                | <u>12047.2</u><br><u>11753.2</u> | <u>14705.2</u> |
|         | K.NEIPIN~SLLPSSK.F                           |                |                                  |                | <u>10208.2</u><br><u>13249.2</u> | <u>12871.2</u> |
| 362-399 | <u>IPINSLPSSKFHQIPSSPSNPVSPAPVRTSRSATQE</u>  |                |                                  |                |                                  |                |
|         | E.IPINSLPSSKFHQ~IPSSPSNPVSPAPVRTSRSATQE.I    |                |                                  | <u>12974.5</u> |                                  |                |
|         | E.IPINSLPSSKFHQIPSSPSNPVS#QPAPVRT#S#RSATQE.I | <u>18459.4</u> |                                  |                |                                  |                |
| 373-391 | <u>FHQIPSSPSNPVSPAPVR</u>                    |                |                                  |                |                                  |                |
|         | K.FHQ~IPSSPSNPVSPAPVR.T                      |                |                                  |                | <u>5314.3</u>                    |                |
|         | K.FHQIPSS#PSNPVSPAPVR.T                      |                | <u>8006.2</u>                    |                | <u>5278.2</u><br><u>5371.2</u>   | <u>7234.2</u>  |
|         | K.FHQIPS#S#PSNPVSPAPVR.T                     |                | <u>9372.2</u>                    |                |                                  | <u>8093.3</u>  |
|         | K.FHQIPSSPSNPVSPAPVR.T                       |                | <u>7488.2</u>                    |                | <u>4901.2</u>                    | <u>6615.2</u>  |
|         | K.FHQIPSSPS#NPVSPAPVR.T                      |                | <u>8434.3</u>                    |                |                                  |                |
| 421-433 | <u>DSNTTDTVHNNVE</u>                         |                |                                  |                |                                  |                |
|         | E.DSNTTDTVHNNVE.G                            | <u>738.2</u>   |                                  | <u>486.2</u>   |                                  | <u>729.2</u>   |
|         | E.DSNTTDTVHN~NVE.G                           |                |                                  |                |                                  | <u>858.2</u>   |
| 436-445 | <u>VNVEENKTEK</u>                            |                |                                  |                |                                  |                |

|         |                      |               |                                                                   |                              |                                |               |                                                                                                                                                                         |
|---------|----------------------|---------------|-------------------------------------------------------------------|------------------------------|--------------------------------|---------------|-------------------------------------------------------------------------------------------------------------------------------------------------------------------------|
|         | K.VNVEENKTEK.E       |               | <u>583.3</u>                                                      |                              |                                |               |                                                                                                                                                                         |
| 436-442 | <u>VNVEENK</u>       |               |                                                                   |                              |                                |               |                                                                                                                                                                         |
|         | K.VNVEENK.T          |               | <u>603.2</u>                                                      |                              |                                |               |                                                                                                                                                                         |
| 445-456 | <u>KEKIITIKSSSE</u>  |               |                                                                   |                              |                                |               |                                                                                                                                                                         |
|         | E.KEKIITIKSSSE.N     | <u>1345.3</u> |                                                                   | <u>945.2</u><br><u>907.3</u> |                                | <u>1306.2</u> |                                                                                                                                                                         |
| 447-456 | <u>KIITIKSSSE</u>    |               |                                                                   |                              |                                |               |                                                                                                                                                                         |
|         | E.KIITIKSSSE.N       | <u>2015.2</u> |                                                                   | <u>1373.2</u>                |                                | <u>1861.2</u> |                                                                                                                                                                         |
| 474-485 | <u>FSANSDINSDIR</u>  |               |                                                                   |                              |                                |               |                                                                                                                                                                         |
|         | K.FSANSDINSDIR.R     |               | <u>7704.2</u><br><u>7873.2</u><br><u>7258.2</u><br><u>25099.2</u> |                              | <u>5028.2</u>                  |               | <u>6319.2</u><br><u>23723.2</u><br><u>6742.2</u><br><u>7540.2</u><br><u>6868.2</u><br><u>7672.2</u><br><u>7308.2</u><br><u>7651.2</u><br><u>7919.2</u><br><u>9746.2</u> |
|         | K.FSANSDIN~SDIR.R    |               | <u>8480.2</u>                                                     |                              | <u>5544.2</u>                  |               | <u>7505.2</u>                                                                                                                                                           |
|         | K.FSAN~SDINSDIR.R    |               |                                                                   |                              | <u>5825.2</u><br><u>5374.2</u> |               | <u>7691.2</u>                                                                                                                                                           |
| 474-486 | <u>FSANSDINSDIRR</u> |               |                                                                   |                              |                                |               |                                                                                                                                                                         |

|         |                              |                                                              |                |                                              |                                  |                |
|---------|------------------------------|--------------------------------------------------------------|----------------|----------------------------------------------|----------------------------------|----------------|
|         | K.FSANSDIN~SDIRR.L           |                                                              |                |                                              | <u>2922.3</u>                    |                |
| 487-506 | <u>LMVNDQFSLSYDASGNITVK</u>  |                                                              |                |                                              |                                  |                |
|         | R.LM*VNDQFSLSYDASGNITVK.L    |                                                              | <u>25160.3</u> |                                              | <u>18656.3</u><br><u>18985.2</u> | <u>23763.3</u> |
| 544-562 | <u>KMLVNMKYNDRDKAKSFME</u>   |                                                              |                |                                              |                                  |                |
|         | E.KM*LVNM*KYN~DRDKAKSFM*E.S  | <u>1770.4</u>                                                |                |                                              | <u>1213.4</u>                    |                |
|         | E.KM*LVNM*KYN~DRDKAKSFME.S   | <u>4746.4</u>                                                |                |                                              | <u>4628.4</u>                    |                |
|         | E.KM*LVNM*KYNDRDKAKSFM*E.S   | <u>672.4</u>                                                 |                |                                              |                                  |                |
|         | E.KMLVN~MKYNDRDKAKSFME.S     | <u>9890.4</u>                                                |                |                                              |                                  |                |
|         | E.KM*LVNMKYN~DRDKAKSFME.S    |                                                              |                |                                              | <u>7362.4</u>                    |                |
| 559-565 | <u>SFMESNK</u>               |                                                              |                |                                              |                                  |                |
|         | K.SFMESNK.K                  |                                                              |                |                                              |                                  | <u>1605.2</u>  |
| 563-575 | <u>SNKLLKAMKEEE</u>          |                                                              |                |                                              |                                  |                |
|         | E.SNKLLKAMKEEE.R             | <u>797.3</u><br><u>823.2</u><br><u>745.4</u><br><u>934.4</u> |                | <u>504.3</u><br><u>521.2</u><br><u>485.4</u> | <u>723.3</u><br><u>713.4</u>     |                |
|         | E.SN~KLLKAMKEEE.R            | <u>2324.4</u><br><u>1857.4</u>                               |                |                                              | <u>1778.4</u>                    |                |
| 574-595 | <u>EERRKRMTSIIHDNHLNLLNE</u> |                                                              |                |                                              |                                  |                |

|         |                                      |                |                |               |                                |                                |
|---------|--------------------------------------|----------------|----------------|---------------|--------------------------------|--------------------------------|
|         | E.EERRKRMTSIIHDNHLNHLNE.I            | <u>10430.4</u> |                |               |                                |                                |
| 574-586 | <b><u>EERRKRMTSIIHD</u></b>          |                |                |               |                                |                                |
|         | E.EERRKRM*TSIIHD.N                   | <u>765.4</u>   |                |               |                                |                                |
| 576-595 | <b><u>RRKRMTSIIHDNHLNHLNE</u></b>    |                |                |               |                                |                                |
|         | E.RRKRMTSIIHDNHLNHLNE.I              |                |                | <u>7529.3</u> |                                |                                |
| 580-599 | <b><u>MTSIIHDNHLNHLNEISTR</u></b>    |                |                |               |                                |                                |
|         | R.MTSIIHDNHLNHLNEISTR.S              |                |                |               |                                | <u>14901.4</u>                 |
|         | R.MTSIIHDNHLNHLN~EISTR.S             |                | <u>17300.4</u> |               |                                |                                |
|         | R.MTSIIHDN~HLNHLNEISTR.S             |                |                |               |                                | <u>15221.4</u>                 |
| 621-642 | <b><u>SASISGISDHQQEGYQPLEQEK</u></b> |                |                |               |                                |                                |
|         | R.SASISGISDHQQ~EGYQ~PLEQ~EK.L        |                | <u>5971.3</u>  |               |                                |                                |
| 640-649 | <b><u>QEKLVDIDNE</u></b>             |                |                |               |                                |                                |
|         | E.QEKLVDIDNE.G                       | <u>7334.2</u>  |                | <u>5519.2</u> | <u>6609.2</u>                  | <u>6693.2</u>                  |
| 642-649 | <b><u>KLVDIDNE</u></b>               |                |                |               |                                |                                |
|         | E.KLVDIDNE.G                         | <u>5599.2</u>  |                | <u>4026.2</u> | <u>4972.2</u>                  |                                |
| 643-659 | <b><u>LVDIDNEGSNANSDSLK</u></b>      |                |                |               |                                |                                |
|         | K.LVDIDNEGSN~ANSDSLK.M               |                | <u>8197.2</u>  |               | <u>5089.2</u><br><u>5184.3</u> | <u>6701.2</u><br><u>7161.2</u> |

|         |                                                      |  |                                                                                                                                                                                       |  |                                                  |  |                                                                                                                                                                                                                                          |
|---------|------------------------------------------------------|--|---------------------------------------------------------------------------------------------------------------------------------------------------------------------------------------|--|--------------------------------------------------|--|------------------------------------------------------------------------------------------------------------------------------------------------------------------------------------------------------------------------------------------|
|         |                                                      |  |                                                                                                                                                                                       |  |                                                  |  | <a href="#">7373.2</a>                                                                                                                                                                                                                   |
|         | K.LVDIDN~EGSNANSDSLK.M                               |  |                                                                                                                                                                                       |  |                                                  |  | <a href="#">7114.2</a><br><a href="#">7101.3</a>                                                                                                                                                                                         |
|         | K.LVDIDNEGSNAN~SDSLK.M                               |  | <a href="#">8285.2</a><br><a href="#">7725.2</a>                                                                                                                                      |  | <a href="#">5003.2</a><br><a href="#">5025.3</a> |  |                                                                                                                                                                                                                                          |
|         | K.LVDIDNEGSNANS#LK.M                                 |  | <a href="#">7858.2</a>                                                                                                                                                                |  |                                                  |  |                                                                                                                                                                                                                                          |
|         | K.LVDIDNEGSNANS#DSLK.M                               |  | <a href="#">8502.2</a>                                                                                                                                                                |  |                                                  |  |                                                                                                                                                                                                                                          |
|         | K.LVDIDNEGS#NANS#DSLK.M                              |  | <a href="#">9417.2</a>                                                                                                                                                                |  |                                                  |  |                                                                                                                                                                                                                                          |
| 650-684 | <a href="#">GSNANSDSLKMGLTISAADTVHKVGIQSM LNSGEE</a> |  |                                                                                                                                                                                       |  |                                                  |  |                                                                                                                                                                                                                                          |
|         | E.GSNANSDSLKM*GLTISAADTVHKVGIQ~SM*LNSGEE.A           |  |                                                                                                                                                                                       |  | <a href="#">13394.4</a>                          |  |                                                                                                                                                                                                                                          |
|         | E.GSNANSDSLKMGLTISAADTVHKVGIQSM*LNSGEE.A             |  |                                                                                                                                                                                       |  | <a href="#">16399.4</a>                          |  |                                                                                                                                                                                                                                          |
| 650-668 | <a href="#">GSNANSDSLKMGLTISAAD</a>                  |  |                                                                                                                                                                                       |  |                                                  |  |                                                                                                                                                                                                                                          |
|         | E.GSNANSDSLKM*GLTISAAD.T                             |  |                                                                                                                                                                                       |  | <a href="#">7974.2</a>                           |  |                                                                                                                                                                                                                                          |
| 660-672 | <a href="#">MGLTISAADTVHK</a>                        |  |                                                                                                                                                                                       |  |                                                  |  |                                                                                                                                                                                                                                          |
|         | K.MGLTISAADTVHK.V                                    |  | <a href="#">9109.3</a><br><a href="#">9117.2</a><br><a href="#">9553.3</a><br><a href="#">25095.3</a><br><a href="#">9782.3</a><br><a href="#">10161.3</a><br><a href="#">10087.3</a> |  |                                                  |  | <a href="#">23720.3</a><br><a href="#">8817.3</a><br><a href="#">8426.3</a><br><a href="#">8161.2</a><br><a href="#">24227.3</a><br><a href="#">7930.3</a><br><a href="#">7938.2</a><br><a href="#">9422.3</a><br><a href="#">9947.3</a> |



|                       |                                 |  |                |  |                |  |                |
|-----------------------|---------------------------------|--|----------------|--|----------------|--|----------------|
|                       |                                 |  |                |  |                |  | <u>9275.3</u>  |
|                       |                                 |  |                |  |                |  | <u>9465.3</u>  |
|                       |                                 |  |                |  |                |  | <u>9994.3</u>  |
| 673-688               | <u>VGIQSM LNSGEEAITK</u>        |  |                |  |                |  |                |
|                       |                                 |  | <u>11563.2</u> |  |                |  |                |
|                       |                                 |  | <u>11907.2</u> |  |                |  |                |
|                       |                                 |  | <u>12000.2</u> |  |                |  | <u>10206.3</u> |
|                       |                                 |  | <u>12017.2</u> |  |                |  | <u>10460.2</u> |
|                       | K.VGIQSM*LNSGEEAITK.E           |  | <u>18893.2</u> |  | <u>8082.2</u>  |  | <u>10093.3</u> |
|                       |                                 |  | <u>11574.3</u> |  |                |  | <u>23745.2</u> |
|                       |                                 |  | <u>25118.2</u> |  |                |  |                |
|                       |                                 |  | <u>18952.3</u> |  |                |  |                |
|                       |                                 |  | <u>9131.2</u>  |  |                |  |                |
|                       |                                 |  | <u>12636.2</u> |  | <u>6021.2</u>  |  | <u>7960.2</u>  |
|                       | K.VGIQSM*LN~SGEEAITK.E          |  | <u>12609.2</u> |  | <u>8569.2</u>  |  | <u>11013.2</u> |
|                       |                                 |  | <u>14954.2</u> |  | <u>8210.2</u>  |  | <u>8004.3</u>  |
|                       |                                 |  | <u>9178.3</u>  |  | <u>6065.3</u>  |  | <u>11082.3</u> |
|                       |                                 |  | <u>18878.3</u> |  | <u>13569.3</u> |  | <u>16875.2</u> |
|                       | K.VGIQSM LNSGEEAITK.E           |  | <u>18856.2</u> |  | <u>13553.2</u> |  | <u>17070.2</u> |
|                       |                                 |  | <u>12399.2</u> |  | <u>8348.2</u>  |  | <u>10725.2</u> |
|                       | K.VGIQSM*LNS#GEEAITK.E          |  |                |  | <u>8204.2</u>  |  | <u>10792.2</u> |
|                       |                                 |  | <u>14923.2</u> |  | <u>10279.2</u> |  | <u>12992.2</u> |
|                       | K.VGIQSM LN~SGEEAITK.E          |  |                |  |                |  |                |
|                       |                                 |  | <u>18755.2</u> |  |                |  |                |
|                       | K.VGIQSM LNS#GEEAITK.E          |  |                |  |                |  |                |
|                       |                                 |  |                |  | <u>14280.2</u> |  |                |
| K.VGIQ~SMLNSGEEAITK.E |                                 |  |                |  |                |  |                |
| 673-695               | <u>VGIQSM LNSGEEAITKENAEYER</u> |  |                |  |                |  |                |

|         |                                        |                |                                |  |               |               |                                                                  |
|---------|----------------------------------------|----------------|--------------------------------|--|---------------|---------------|------------------------------------------------------------------|
|         | K.VGIQSM*LNSGEEAITKENAEYER.K           |                | <u>14280.3</u>                 |  |               |               |                                                                  |
| 685-694 | <u>AITKENAEYE</u>                      |                |                                |  |               |               |                                                                  |
|         | E.AITKEN~AEYE.R                        | <u>1682.2</u>  |                                |  |               | <u>1573.2</u> |                                                                  |
| 689-695 | <u>ENAEYER</u>                         |                |                                |  |               |               |                                                                  |
|         | K.ENAEYER.K                            |                |                                |  | <u>345.2</u>  |               | <u>604.2</u>                                                     |
| 703-733 | <u>TTTFVPLENSQPSDTIRKRTAGDDGALDQTE</u> |                |                                |  |               |               |                                                                  |
|         | E.TTTFVPLENSQPSDT#IRKRTAGDDGALDQTE.N   | <u>12686.4</u> |                                |  |               |               |                                                                  |
| 711-733 | <u>NSQPSDTIRKRTAGDDGALDQTE</u>         |                |                                |  |               |               |                                                                  |
|         | E.N~SQPSDTIRKRTAGDDGALDQTE.N           |                |                                |  |               | <u>4807.3</u> |                                                                  |
| 721-740 | <u>RTAGDDGALDQTENTSISPK</u>            |                |                                |  |               |               |                                                                  |
|         | K.RTAGDDGALDQTENTSISPK.K               |                | <u>4123.2</u><br><u>4106.2</u> |  | <u>2683.3</u> |               | <u>3658.2</u><br><u>3597.3</u>                                   |
|         | K.RTAGDDGALDQTENTSIS#PK.K              |                | <u>4585.2</u><br><u>4572.2</u> |  |               |               | <u>3997.3</u>                                                    |
|         | K.RTAGDDGALDQTENTSIS#PK.K              |                | <u>4772.3</u>                  |  |               |               |                                                                  |
| 722-740 | <u>TAGDDGALDQTENTSISPK</u>             |                |                                |  |               |               |                                                                  |
|         | R.TAGDDGALDQTEN~TSISPK.K               |                |                                |  |               |               | <u>5689.2</u><br><u>4385.2</u><br><u>5809.2</u><br><u>5763.2</u> |

|  |                           |  |                                                                                                                     |  |                                                                                   |  |                                                                                                                                      |
|--|---------------------------|--|---------------------------------------------------------------------------------------------------------------------|--|-----------------------------------------------------------------------------------|--|--------------------------------------------------------------------------------------------------------------------------------------|
|  |                           |  |                                                                                                                     |  |                                                                                   |  | <u>6146.2</u>                                                                                                                        |
|  | R.TAGDDGALDQTENTSISPK.K   |  | <u>5483.2</u><br><u>5644.2</u><br><u>5663.3</u><br><u>6310.2</u><br><u>4082.2</u><br><u>5506.3</u><br><u>6264.3</u> |  | <u>3648.2</u><br><u>3527.2</u>                                                    |  | <u>5492.2</u><br><u>4720.2</u><br><u>4891.2</u><br><u>5304.2</u><br><u>3453.2</u><br><u>4844.2</u><br><u>4914.3</u><br><u>4453.3</u> |
|  | R.TAGDDGALDQ~TENTSISPK.K  |  |                                                                                                                     |  |                                                                                   |  | <u>5863.2</u><br><u>5908.2</u><br><u>5930.2</u><br><u>5835.2</u>                                                                     |
|  | R.TAGDDGALDQTEN~TIS#PK.K  |  | <u>6948.2</u><br><u>5642.2</u>                                                                                      |  | <u>3523.2</u><br><u>3544.2</u><br><u>3553.2</u><br><u>3577.2</u>                  |  |                                                                                                                                      |
|  | R.TAGDDGALDQTENTSIS#PK.K  |  | <u>5394.2</u><br><u>5956.3</u><br><u>6308.2</u><br><u>5450.3</u><br><u>5736.2</u><br><u>5543.3</u>                  |  | <u>3755.2</u><br><u>3376.2</u><br><u>4015.2</u><br><u>3765.3</u><br><u>3735.2</u> |  | <u>5117.2</u><br><u>4692.3</u>                                                                                                       |
|  | R.TAGDDGALDQTENTS#IS#PK.K |  | <u>5769.2</u><br><u>6094.2</u><br><u>6221.2</u><br><u>6268.2</u>                                                    |  | <u>3791.2</u><br><u>3777.2</u><br><u>3623.2</u><br><u>3611.2</u>                  |  | <u>5064.2</u><br><u>5155.2</u><br><u>5204.2</u><br><u>4991.2</u>                                                                     |

|         |                                    |                |               |                |               |               |               |
|---------|------------------------------------|----------------|---------------|----------------|---------------|---------------|---------------|
|         | R.TAGDDGALDQ~TENT#PK.K             |                |               |                | <u>4424.2</u> |               |               |
|         |                                    |                |               |                | <u>4438.2</u> |               |               |
|         | R.TAGDDGALDQTENT#SISPK.K           |                |               |                |               |               | <u>5113.3</u> |
| 722-741 | <u><b>TAGDDGALDQTENT#SISPK</b></u> |                |               |                |               |               |               |
|         | R.TAGDDGALDQTENT#PKK.R             |                | <u>3841.2</u> |                | <u>2429.2</u> |               |               |
|         |                                    |                |               |                | <u>2441.2</u> |               |               |
| 753-769 | <u><b>DEGERGVGNSGLATVE</b></u>     |                |               |                |               |               |               |
|         | E.DEGERGVGNSGLATVE.N               | <u>6736.2</u>  |               |                |               | <u>6114.2</u> |               |
|         |                                    |                |               |                |               | <u>6099.2</u> |               |
| 755-769 | <u><b>GERGVGNSGLATVE</b></u>       |                |               |                |               |               |               |
|         | E.GERGVGN~SGLATVE.N                | <u>6284.2</u>  |               | <u>4900.2</u>  |               | <u>5873.2</u> |               |
|         | E.GERGVGNSGLATVE.N                 | <u>5447.2</u>  |               | <u>3984.2</u>  |               | <u>4922.2</u> |               |
| 792-808 | <u><b>SANDSSNGNGLGLTE</b></u>      |                |               |                |               |               |               |
|         | E.SANDSSN~GNGN~LGLGTE.S            | <u>6877.2</u>  |               |                |               |               |               |
|         | E.SANDSSN~GN~GNLGLGTE.S            | <u>6772.2</u>  |               | <u>5360.2</u>  |               | <u>6086.2</u> |               |
|         |                                    | <u>7306.2</u>  |               |                |               | <u>6454.2</u> |               |
|         | E.SANDSSNGN~GNLGLGTE.S             |                |               |                |               | <u>6232.2</u> |               |
|         | E.SANDSSNGNGLGLGTE.S               | <u>6287.2</u>  |               | <u>4488.2</u>  |               | <u>5513.2</u> |               |
| 809-825 | <u><b>SRNTLLTATPIELICRE</b></u>    |                |               |                |               |               |               |
|         | E.SRNTLLTAT#PIELIC@RE.G            | <u>20394.3</u> |               | <u>17057.3</u> |               |               |               |

|         |                         |                                  |                                                                      |                                                    |  |                                                                                                          |
|---------|-------------------------|----------------------------------|----------------------------------------------------------------------|----------------------------------------------------|--|----------------------------------------------------------------------------------------------------------|
|         | E.SRNTLLTATPIELIC@RE.G  | <u>20760.3</u><br><u>20802.2</u> |                                                                      | <u>17396.2</u><br><u>17530.3</u><br><u>17336.3</u> |  |                                                                                                          |
|         | E.SRN~TLLTATPIELIC@RE.G | <u>21312.3</u>                   |                                                                      | <u>17948.3</u><br><u>17934.3</u>                   |  |                                                                                                          |
|         | E.SRNTLLTATPIELIC^RE.G  | <u>21903.3</u>                   |                                                                      | <u>17580.3</u><br><u>18425.3</u>                   |  |                                                                                                          |
| 809-820 | <u>SRNTLLTATPIE</u>     |                                  |                                                                      |                                                    |  |                                                                                                          |
|         | E.SRNTLLTAT#PIE.L       | <u>12500.2</u>                   |                                                                      | <u>9576.2</u>                                      |  | <u>11276.2</u>                                                                                           |
|         | E.SRN~TLLTATPIE.L       | <u>13277.2</u><br><u>13330.2</u> |                                                                      | <u>10164.2</u>                                     |  | <u>11902.2</u>                                                                                           |
| 811-824 | <u>NTLLTATPIELICR</u>   |                                  |                                                                      |                                                    |  |                                                                                                          |
|         | R.NTLLTATPIELIC@R.E     |                                  | <u>22212.3</u><br><u>22192.2</u>                                     | <u>16276.3</u><br><u>16244.2</u>                   |  | <u>20032.3</u><br><u>20010.2</u>                                                                         |
|         | R.NTLLTATPIELIC^R.E     |                                  | <u>23201.3</u><br><u>22414.2</u><br><u>23199.2</u><br><u>22523.3</u> | <u>17008.3</u><br><u>16470.2</u>                   |  | <u>20288.3</u><br><u>21028.3</u><br><u>21020.2</u><br><u>20236.2</u><br><u>20339.3</u><br><u>23128.2</u> |
|         | R.NTLLTAT#PIELIC@R.E    |                                  | <u>21528.2</u>                                                       | <u>15663.3</u><br><u>15691.3</u><br><u>15619.2</u> |  | <u>19379.2</u><br><u>19383.3</u>                                                                         |
|         | R.NTLLTATPIELICR.E      |                                  | <u>23436.2</u>                                                       | <u>17133.2</u>                                     |  |                                                                                                          |

|         |                            |               |                |  |                |               |                |
|---------|----------------------------|---------------|----------------|--|----------------|---------------|----------------|
|         | R.NTLLTAT#PIELIC^R.E       |               | <u>22727.2</u> |  | <u>16619.2</u> |               |                |
|         |                            |               | <u>22762.3</u> |  | <u>16627.3</u> |               |                |
|         | R.NTLLT#ATPIELIC@R.E       |               | <u>21654.3</u> |  |                |               |                |
| 831-847 | <u>RDIPDVPITTGAYLEFK</u>   |               |                |  |                |               |                |
|         | R.RDIPDVPITTGAYLEFK.F      |               | <u>19200.3</u> |  | <u>13768.3</u> |               | <u>17119.3</u> |
|         |                            |               | <u>19042.3</u> |  |                |               |                |
| 832-847 | <u>DIPDVPITTGAYLEFK</u>    |               |                |  |                |               |                |
|         | R.DIPDVPITTGAYLEFK.F       |               | <u>21964.2</u> |  | <u>16089.2</u> |               | <u>19884.2</u> |
|         |                            |               | <u>21983.3</u> |  | <u>16129.3</u> |               | <u>20240.2</u> |
|         |                            |               | <u>22317.2</u> |  | <u>16171.3</u> |               | <u>20791.2</u> |
|         |                            |               | <u>22534.2</u> |  | <u>16407.2</u> |               | <u>20391.2</u> |
|         |                            |               | <u>22640.2</u> |  | <u>16602.2</u> |               | <u>21945.2</u> |
|         |                            |               | <u>22426.2</u> |  | <u>16480.2</u> |               | <u>20116.3</u> |
|         |                            |               |                |  |                |               | <u>20451.2</u> |
|         |                            |               |                |  |                |               | <u>19886.3</u> |
|         |                            |               |                |  |                |               | <u>24208.2</u> |
| 846-854 | <u>FKFKAKEEE</u>           |               |                |  |                |               |                |
|         | E.FKFKAKEEE.L              | <u>1138.3</u> |                |  |                | <u>1129.3</u> |                |
|         |                            |               |                |  |                | <u>1168.2</u> |                |
| 850-868 | <u>AKEEELINSSINEEDYAAK</u> |               |                |  |                |               |                |
|         | K.AKEEELIN~SSINEEDYAAK.S   |               | <u>9887.3</u>  |  |                |               | <u>10327.2</u> |
|         |                            |               | <u>9988.2</u>  |  | <u>6720.2</u>  |               | <u>10272.3</u> |
|         |                            |               | <u>11804.3</u> |  |                |               |                |
|         | K.AKEEELINSSIN~EEDYAAK.S   |               | <u>11325.3</u> |  | <u>7651.3</u>  |               |                |

|         |                           |                |                |               |               |                                                 |                |
|---------|---------------------------|----------------|----------------|---------------|---------------|-------------------------------------------------|----------------|
|         |                           |                |                |               | <u>7181.3</u> |                                                 |                |
|         | K.AKEEELINSS#INEEDYAAK.S  |                | <u>10731.2</u> |               | <u>7269.2</u> |                                                 |                |
|         | K.AKEEELINSSINEEDYAAK.S   |                |                |               |               |                                                 | <u>10216.3</u> |
| 852-868 | <u>EEELINSSINEEDYAAK</u>  |                |                |               |               |                                                 |                |
|         | K.EEELIN~SSINEEDYAAK.S    |                | <u>11801.2</u> |               |               |                                                 | <u>11195.2</u> |
| 855-872 | <u>LINSSINEEDYAAKSKHE</u> |                |                |               |               |                                                 |                |
|         | E.LINSS#INEEDYAAKSKHE.K   |                |                | <u>3992.3</u> |               |                                                 |                |
| 855-862 | <u>LINSSINE</u>           |                |                |               |               |                                                 |                |
|         | E.LINSSINE.E              | <u>5201.2</u>  |                | <u>3657.2</u> |               | <u>4563.2</u>                                   |                |
| 873-886 | <u>KMNAHFFKPDIQEE</u>     |                |                |               |               |                                                 |                |
|         | E.KMNAHFFKPDIQEE.T        | <u>9630.2</u>  |                | <u>7600.2</u> |               | <u>8834.2</u>                                   |                |
|         | E.KM*N~AHFFKPDIQEE.T      | <u>8482.3</u>  |                |               |               | <u>7777.3</u><br><u>7827.3</u><br><u>7449.3</u> |                |
|         | E.KM*NAHFFKPDIQEE.T       | <u>7226.2</u>  |                |               |               |                                                 |                |
| 893-901 | <u>ILSKTTLTE</u>          |                |                |               |               |                                                 |                |
|         | E.ILSKTTLTE.K             | <u>4953.2</u>  |                | <u>3532.2</u> |               | <u>4425.2</u>                                   |                |
| 918-929 | <u>NKLVGLGLKLRE</u>       |                |                |               |               |                                                 |                |
|         | E.NKLVGLGLKLRE.S          | <u>11224.3</u> |                | <u>8816.3</u> |               | <u>10338.3</u>                                  |                |

|           |                                |  |                                                    |                |                                |                                                                      |
|-----------|--------------------------------|--|----------------------------------------------------|----------------|--------------------------------|----------------------------------------------------------------------|
|           |                                |  |                                                    |                |                                | <u>10386.2</u>                                                       |
| 956-967   | <b><u>RFHNYTILHAVK</u></b>     |  |                                                    |                |                                |                                                                      |
|           | R.RFHNYTILHAVK.E               |  | <u>5614.3</u>                                      |                | <u>3691.4</u><br><u>3788.4</u> |                                                                      |
|           | R.RFHN~YTILHAVK.E              |  | <u>10478.4</u>                                     |                |                                |                                                                      |
| 957-967   | <b><u>FHNYTILHAVK</u></b>      |  |                                                    |                |                                |                                                                      |
|           | R.FHNYTILHAVK.E                |  | <u>7703.3</u><br><u>7726.2</u>                     |                | <u>5065.3</u><br><u>5077.2</u> | <u>6722.3</u><br><u>6763.2</u><br><u>7031.3</u>                      |
|           | R.FHN~YTILHAVK.E               |  | <u>12422.3</u>                                     |                |                                | <u>10860.3</u>                                                       |
| 979-991   | <b><u>SVSWFYNHITLLK</u></b>    |  |                                                    |                |                                |                                                                      |
|           | R.SVSWFYN~HITLLK.M             |  | <u>21069.2</u><br><u>21133.2</u><br><u>21062.3</u> |                |                                | <u>19058.2</u><br><u>20612.2</u><br><u>19047.3</u><br><u>20631.2</u> |
| 992-1006  | <b><u>MILYDLC@DNVTTQWR</u></b> |  |                                                    |                |                                |                                                                      |
|           | K.MILYDLC@DNVTTQWR.E           |  | <u>21445.2</u><br><u>21440.3</u><br><u>21657.3</u> |                | <u>15696.2</u>                 |                                                                      |
| 1008-1014 | <b><u>WMFPHNE</u></b>          |  |                                                    |                |                                |                                                                      |
|           | E.WMFPHNE.T                    |  |                                                    | <u>10015.2</u> |                                | <u>11714.2</u><br><u>11927.2</u>                                     |



|           |                                       |                                                    |                                                                         |                                                    |                         |                                                                         |
|-----------|---------------------------------------|----------------------------------------------------|-------------------------------------------------------------------------|----------------------------------------------------|-------------------------|-------------------------------------------------------------------------|
| 1015-1031 | <a href="#">TLPALGQDGINEDNLNE</a>     |                                                    |                                                                         |                                                    |                         |                                                                         |
|           | E.TLPALGQDGINEDNLNE.T                 | <a href="#">15785.2</a><br><a href="#">15680.2</a> |                                                                         | <a href="#">12542.2</a><br><a href="#">12825.2</a> |                         |                                                                         |
|           | E.TLPALGQ~DGINEDNLNE.T                | <a href="#">16426.2</a><br><a href="#">16476.2</a> |                                                                         |                                                    |                         |                                                                         |
|           | E.TLPALGQDGIN~EDNLNE.T                | <a href="#">16293.2</a>                            |                                                                         |                                                    |                         |                                                                         |
| 1015-1026 | <a href="#">TLPALGQDGINE</a>          |                                                    |                                                                         |                                                    |                         |                                                                         |
|           | E.TLPALGQDGINE.D                      | <a href="#">13545.2</a><br><a href="#">13779.2</a> |                                                                         |                                                    | <a href="#">12579.2</a> |                                                                         |
| 1015-1034 | <a href="#">TLPALGQDGINEDNLNETID</a>  |                                                    |                                                                         |                                                    |                         |                                                                         |
|           | E.TLPALGQDGINEDNLNETID.N              | <a href="#">18609.2</a>                            |                                                                         |                                                    |                         |                                                                         |
| 1027-1047 | <a href="#">DNLNETIDNMLIFDFLDDGSE</a> |                                                    |                                                                         |                                                    |                         |                                                                         |
|           | E.DN~LNET#IDNM*LIFDFLDDGSE.N          | <a href="#">1038.3</a>                             |                                                                         |                                                    |                         |                                                                         |
| 1066-1084 | <a href="#">DHDGDYKDHDIDYKDDDDK</a>   |                                                    |                                                                         |                                                    |                         |                                                                         |
|           | K.DHDGDYKDHDIDYKDDDDK.-               |                                                    | <a href="#">646.3</a><br><a href="#">641.4</a><br><a href="#">643.5</a> | <a href="#">374.3</a>                              |                         | <a href="#">674.2</a><br><a href="#">667.3</a><br><a href="#">655.5</a> |
| 1073-1084 | <a href="#">DHDIDYKDDDDK</a>          |                                                    |                                                                         |                                                    |                         |                                                                         |
|           | K.DHDIDYKDDDDK.-                      |                                                    | <a href="#">622.3</a>                                                   |                                                    |                         |                                                                         |
